1

2

## Title: Eukaryotic Acquisition of a Bacterial Operon

3

4 **Authors:** Jacek Kominek<sup>1,2,†</sup>, Drew T. Doering<sup>1,3,†</sup>, Dana A. Opulente<sup>1</sup>, Xing-Xing Shen<sup>4</sup>,

5 Xiaofan Zhou<sup>4</sup>, Jeremy DeVirgilio<sup>5</sup>, Amanda B. Hulfachor<sup>3</sup>, Cletus P. Kurtzman<sup>5</sup>, Antonis

6 Rokas<sup>4</sup>, Chris Todd Hittinger<sup>1,2,3\*</sup>

### 7 **Affiliations:**

8 <sup>1</sup>Laboratory of Genetics, Genome Center of Wisconsin, Wisconsin Energy Institute, J. F. Crow

9 Institute for the Study of Evolution, University of Wisconsin-Madison, Madison, WI 53706,

10 USA.

11 <sup>2</sup>DOE Great Lakes Bioenergy Research Center, University of Wisconsin-Madison, WI 53706,

12 USA.

13 <sup>3</sup>Graduate Program in Cellular and Molecular Biology, University of Wisconsin-Madison,

14 Madison, WI 53706, USA.

15 <sup>4</sup>Department of Biological Sciences, Vanderbilt University, Nashville, TN 37235, USA.

16 <sup>5</sup>Mycotoxin Prevention and Applied Microbiology Research Unit, National Center for

17 Agricultural Utilization Research, Agricultural Research Service, US Department of Agriculture,

18 Peoria, IL 61604, USA.

19

20 \*Correspondence to: [cthittinger@wisc.edu](mailto:cthittinger@wisc.edu).

21 †These authors contributed equally to this work

22

23 **Abstract:**

24 Operons are a hallmark of bacterial genomes, where they allow concerted expression of  
25 multiple functionally related genes as single polycistronic transcripts. They are rare in  
26 eukaryotes, where each gene usually drives expression of its own independent messenger RNAs.  
27 Here we report the horizontal operon transfer of a catecholate-class siderophore biosynthesis  
28 pathway from Enterobacteriaceae into a group of closely related yeast taxa. We further show that  
29 the co-linearly arranged secondary metabolism genes are actively expressed, exhibit mainly  
30 eukaryotic transcriptional features, and enable the sequestration and uptake of iron. After transfer  
31 to the eukaryotic host, several genetic changes occurred, including the acquisition of  
32 polyadenylation sites, structural rearrangements, integration of eukaryotic genes, and secondary  
33 loss in some lineages. We conclude that the operon genes were likely captured in the shared  
34 insect gut habitat, modified for eukaryotic gene expression, and maintained by selection to adapt  
35 to the highly-competitive, iron-limited environment.

36

37 **Main Text:**

38 The core processes of the Central Dogma of Biology, transcription and translation, are  
39 broadly conserved across living organisms. Nonetheless, there are seemingly fundamental  
40 differences between the domains of life in how these processes are realized. Eukaryotic  
41 transcription is spatially and temporally separated from translation and generally operates on  
42 individual genes through a complex interplay of transcription factors and chromatin remodeling  
43 complexes. Nascent mRNAs are co-transcriptionally processed by adding 3' polyadenosine  
44 (poly(A)) tails and 5' caps of 7-methyl-guanosine (m<sup>7</sup>G) before they are trafficked out of the

45 nucleus for translation. In bacteria, transcription is tightly coupled with translation, and both  
46 occur inside the cytosol. Furthermore, bacterial transcription often operates on clusters of genes,  
47 known as operons, where a single regulatory region regulates the expression of physically-linked  
48 genes into a polycistronic mRNA that is minimally processed and translated into several  
49 polypeptides at similar abundance. In contrast, eukaryotic operons, which are rare in most taxa  
50 but are frequently found in nematodes (1, 2) and tunicates (3, 4), are processed by trans-splicing  
51 and related mechanisms. Operon dissemination has been proposed to occur predominantly via  
52 horizontal gene transfer (HGT) (5, 6), a process where organisms acquire genes from sources  
53 other than their parents. HGT is pervasive and richly documented among bacteria, but it is  
54 thought to be rarer in eukaryotes (7–11). Known examples of bacterium-to-eukaryote HGT  
55 occurred as single genes, but never as operons. Nonetheless, horizontal operon transfer (HOT)  
56 into eukaryotes would allow even complex pathways to spread rapidly, especially in  
57 environments where competition for key nutrients is intense.

58 One such nutrient is iron, which plays crucial roles in many essential cellular processes (12–  
59 14) and is a key determinant of virulence in both animal and plant pathogens (15–17). Many  
60 specialized systems have evolved to sequester it from the surrounding environment, one of which  
61 is the biosynthesis of small-molecule iron chelators called siderophores. Most bacteria synthesize  
62 catecholate-class siderophores (18), whereas hydroxamate-class siderophores are commonplace  
63 in fungi (19). A notable exception is the budding yeast lineage (subphylum Saccharomycotina),  
64 which has long been thought to completely lack the ability to synthesize their own siderophores,  
65 despite its ability to utilize them (19). Here we survey a broad range of fungal genomes for  
66 known components of iron uptake and storage systems. Although most systems are broadly  
67 conserved, we identify a clade of closely related yeast species that contains a bacterial  
68 siderophore biosynthesis pathway. Through phylogenetic hypothesis testing, we show that this

69 pathway was acquired through horizontal operon transfer (HOT) from the bacterial family  
70 Enterobacteriaceae, which includes *Escherichia coli*, *Erwinia carotovora*, *Yersinia pestis*, and  
71 relatives that share the insect gut niche with many of these yeasts (20). After acquisition, the  
72 operon underwent structural changes and progressively gained eukaryotic characteristics, while  
73 maintaining the clustering of functionally related genes. Transcriptomic experiments and  
74 analyses show that the siderophore biosynthesis genes are actively expressed, contain poly(A)  
75 tails, and exhibit evidence of mostly monocistronic transcripts, as well as some potentially  
76 bicistronic transcripts. *In vivo* assays also demonstrate the biosynthesis and secretion of  
77 functional catecholate-class siderophores in several of these yeast species. This remarkable  
78 example shows how eukaryotes can acquire a functional bacterial operon, while modifying its  
79 transcription to domesticate and maintain expression as a set of linked eukaryotic genes.

80

## 81 **Results:**

### 82 **Iron uptake and storage is conserved in fungi**

83 We surveyed the genome sequences of 175 fungal species and observed broad conservation  
84 of genes involved in low-affinity iron uptake, vacuolar iron storage, reductive iron assimilation,  
85 heme degradation, and siderophore import systems (Fig. 1, Table S1). In contrast, genes involved  
86 in siderophore biosynthesis pathways were more dynamic. Siderophore biosynthesis was thought  
87 to be completely absent in budding yeasts (19), but the genomes of *Lipomyces starkeyi* and  
88 *Tortispora caseinolytica* contain homologs of the *SidA*, *SidC*, *SidD*, *SidF*, and *SidL* genes  
89 involved in the biosynthesis of ferricrocin and fusarinine C, which are hydroxamate-class  
90 siderophores synthesized from L-ornithine by many filamentous fungi, such as *Aspergillus*  
91 *nidulans* (19). Since these species are the earliest-branching budding yeast taxa, the presence of  
92 this pathway in their genomes is likely an ancestral trait inherited from the last common ancestor

93 of the Pezizomycotina and Saccharomycotina, while its absence in most yeasts is likely due to a  
94 loss early in budding yeast evolution. Surprisingly, the genomes of three closely related  
95 Trichomonascaceae species (*Candida versatilis*, *Candida apicola*, and *Starmerella bombicola*)  
96 contain multiple homologs of bacterial siderophore biosynthesis genes (*entA-F*) that are  
97 predicated to enable the synthesis of catecholate-class siderophores from chorismate (21) (Fig.  
98 S1). These genes are co-linear and predicted to be expressed from the same strand of DNA,  
99 features that are both reminiscent of the operons where these genes are found in bacteria.

100

### 101 **Horizontal operon transfer (HOT) from bacteria to yeasts**

102 To investigate the evolutionary history of these genes, we sequenced and analyzed 18  
103 additional genomes from the *Wickerhamiella/Starmerella* clade (W/S clade, Table S2) and  
104 identified the catecholate-class siderophore biosynthesis pathway in 12 of these species (Fig. 2a,  
105 2c). To determine whether the yeast siderophore biosynthesis genes were horizontally acquired  
106 from a bacterial operon, we first used the *ent* genes found in yeasts to perform BLAST queries  
107 against the bacterial data present in GenBank and found that the top hits belonged to a range of  
108 species from the family Enterobacteriaceae. Since no single taxon was overrepresented, we  
109 surveyed 1,336 publicly available genomes from the class Gammaproteobacteria, to which the  
110 Enterobacteriaceae belongs, for the presence of *entA-entF* homologs and extracted them from all  
111 207 genomes where all six genes could be reliably identified (Table S3). We then reconstructed  
112 unconstrained maximum-likelihood (ML) phylogenies for each *ent* gene, as well as for a  
113 concatenated super-alignment of all six genes (*entABCDEF*, Table S4). Since *entF* contributed  
114 nearly two-thirds of the total alignment length, we also evaluated a super-alignment of the  
115 remaining five genes (*entABCDE*, Fig. 2a).

116 Consistent with the BLAST results, the yeast sequences formed a highly-supported,  
117 monophyletic group nested within the Enterobacteriaceae lineage on all gene trees, placing their  
118 donor lineage after the divergence of the *Serratia/Rouxiella* lineage and before the divergence of  
119 the *Pantoea/Erwinia* lineage from closer relatives of *E. coli*. To formally test the hypothesis of  
120 an Enterobacteriaceae origin, we reconstructed phylogenies under the constraints that yeast  
121 sequences either group together with the Enterobacteriaceae (EO) or outside of that clade (non-  
122 EO). We then employed the approximately unbiased (AU) test to determine if the EO  
123 phylogenies were a statistically better explanation of the data than the non-EO phylogenies. The  
124 EO phylogeny was strongly preferred (p-value  $< 10^{-3}$ ) for the six- and five-gene concatenation  
125 data matrices (Fig. 2d). Individual genes carried weak signal due to their short lengths, but the  
126 *entC*, *entE*, and *entF* genes nonetheless strongly supported the Enterobacteriaceae origin (p-value  
127  $< 0.05$ ), *entA* and *entB* had consistent but weaker support, and no individual gene rejected the EO  
128 hypothesis. Next, we sought to determine the course of the transfer event and tested a single-  
129 source, single-transfer hypothesis against multi-source and multi-transfer alternatives, each of  
130 which predicted specific phylogenetic patterns (Fig. 2c). AU tests on the reconstructed  
131 phylogenies did not support multiple transfer events and instead supported the simplest  
132 explanation that the HOT event occurred from a single source lineage directly into a single  
133 common ancestor of the W/S clade yeasts (Fig. 2d).

134

### 135 **Transferred genes have mainly eukaryotic transcript features**

136 To determine whether and how these yeasts overcame the differences between eukaryotic and  
137 bacterial gene expression, we sequenced mRNA from *C. versatilis*, *C. apicola*, and *St.*  
138 *bombicola*. These species were chosen due to their diverse gene cluster structures and positions  
139 on the phylogenetic tree: *C. versatilis* was chosen as an early-branching representative whose

140 structure appeared to be more similar to the ancestral operon, while *St. bombicola* and *C. apicola*  
141 appeared to represent more derived stages of evolution in the eukaryotic hosts. Each of the three  
142 species expressed mRNAs for the siderophore biosynthesis genes, and *C. versatilis* expression  
143 was the highest (Table S6).

144 We then examined the transcriptomic data for characteristics that are typically bacterial or  
145 eukaryotic. The length of intergenic regions was not divisible by three, so we immediately  
146 excluded the hypothesis that they were translated as a single fused polypeptide. The *C. versatilis*  
147 genes were expressed at similar levels, whereas *St. bombicola* and *C. apicola* genes showed  
148 significant diversity in their expression (Table S6, Fig. 4, Figs S2-S4). Interestingly, we also  
149 observed that the siderophore biosynthesis genes in *C. versatilis* had much shorter intergenic  
150 sequences than their counterparts in *St. bombicola* and *C. apicola*, which were each shorter than  
151 their respective genome-wide means (within gene cluster intergenic means were 158, 484, and  
152 377 bps versus genome-wide means of 370, 549, and 455 bps for *C. versatilis*, *St. bombicola* and  
153 *C. apicola*, respectively). Shorter intergenic distances can enhance transcriptional coupling  
154 between neighboring genes inside operons (22, 23), so these results suggest that *C. versatilis*  
155 might have retained this feature due to selection for concerted expression.

156 To further investigate operon-like characteristics that may have been retained, we analyzed  
157 read pairs in which the forward and reverse reads mapped to different genes, providing physical  
158 evidence of transcripts composed of multiple genes. To quantify this signal, we calculated the  
159 per-site ratio of the actual sequence coverage and the coverage spanned by the inserts between  
160 read pairs (i.e. coverage/span coverage). Ratios of 50% are expected for most of the length of a  
161 transcript, while ratios of 100% indicate the ends of the transcripts. Thus, transcript boundaries  
162 are visualized as a coverage trough between two spikes approaching 100% ratios. Ratios below  
163 100% at the putative 5' or 3' ends of annotated transcripts, coupled with non-zero coverage of

164 their intergenic regions, provide evidence of overlapping (and potentially bicistronic) transcripts.  
165 Most transcripts predicted to be involved in siderophore biosynthesis were monocistronic in *St.*  
166 *bombicola*, *C. apicola*, and *C. versatilis*, but *C. versatilis* had a sub-population of potentially  
167 overlapping mRNAs, including the *entB* and *entD* genes on one end, as well as the *entE*, *entA*,  
168 and *entH* genes on the other (Fig. 4), with the *entE-entA-entH* genes showing the strongest signal  
169 of overlap. Previously reported yeast bicistronic transcripts have been attributed mainly to  
170 inefficiencies in the RNA transcription machinery (24, 25), whereas the yeast *ent* transcripts we  
171 have described here encode functionally related steps of a biosynthesis pathway that may retain  
172 some polycistronic characteristics from their ancestry as parts of a bacterial operon.

173 We also examined the transcriptomic data for evidence of transcriptional processing and  
174 found that many of the siderophore biosynthesis genes contained putative polyA tails (Fig 4.,  
175 Figs S2-S4). We did not find any evidence suggesting that 5' caps were added by trans-splicing  
176 (26) or by alternatively cis-splicing a common cassette exon upstream of each protein-coding  
177 region (27). Thus, we conclude that, even in *C. versatilis*, the majority of transcripts are likely  
178 transcribed and processed through conventional eukaryotic mechanisms that involve distinct  
179 promoters and polyadenylation sites for each gene. These results further suggest that most  
180 sequence modifications for eukaryotic expression act pre- or co-transcriptionally, rather than  
181 through specialized sequences to enable translation.

182

### 183 **Bacterial siderophore biosynthesis is functional in yeasts**

184 To determine whether yeasts that contain the *ent* biosynthesis genes actually produce  
185 siderophores, we grew them on a low-iron medium overlaid with iron-complexed indicators. In  
186 presence of iron chelators, such as siderophores, the medium changes color from blue to orange,  
187 in a characteristic halo pattern that tracks the diffusion gradient of siderophores secreted from



188 colonies into the surrounding medium. We tested the 18 yeast species from the W/S clade that  
189 we sequenced, together with eight outgroup species spread broadly across the yeast phylogeny  
190 (including *S. cerevisiae*) and *E. coli* as a positive control, and we observed unambiguously strong  
191 signals of siderophore production in five species, all of which contained the siderophore  
192 biosynthesis genes (Fig. 4, Fig. S5). The lack of signal in other species harboring the siderophore  
193 biosynthesis genes could suggest the secondary inactivation of the pathway (through  
194 mechanisms other than nonsense or frameshift mutations, which are absent), but it is more likely  
195 that siderophore production is below the sensitivity of the CAS assay or is not induced under the  
196 conditions studied. Nevertheless, this experiment conclusively shows that the bacterial  
197 siderophore biosynthesis are, not only transcriptionally active, but also fully functional in at least  
198 some W/S clade yeasts.

199

## 200 **Evolution of a bacterial operon inside a eukaryotic host**

201 Given the significant differences in Central Dogma processes between bacteria and  
202 eukaryotes, we investigated how the horizontally transferred operon was successfully assimilated  
203 into these yeasts by mapping key changes in gene content, structure, and regulation onto the  
204 phylogeny (Fig. 5a). First, the phylogenetic distribution of the operon genes suggests at least five  
205 cases of secondary loss in W/S clade yeasts, a common occurrence for other fungal gene clusters  
206 (28–31). Although all taxa contain the six core genes (*entA-F*), *C. versatilis* uniquely harbors a  
207 homolog of the *entH* gene, which encodes a proofreading thioesterase that is not strictly required  
208 for siderophore biosynthesis (32). Since no homologs or remnants of other genes from the  
209 bacterial operon could be identified, we hypothesize that they were lost due to functional  
210 redundancy with genes already present in yeast genomes (e.g. the bacterial ABC transporters  
211 *fepA-G* are redundant with the yeast major facilitator superfamily transporters *ARN1-4*, the

212 bacterial esterase *fes* is redundant with yeast ferric reductases (*FRE1-8*). Second, most extant  
213 Enterobacteriaceae species closely related to the source lineage share an operon structure similar  
214 to that of *E. coli* (Table S4), which is more complex than that of the W/S clade yeasts (Fig. 5b).  
215 Based on this evidence and a molecular clock (33), we infer that an ancient bacterial operon,  
216 whose structure was somewhere between that of *E. coli* and *C. versatilis*, was horizontally  
217 transferred into a yeast cell tens of millions of years ago. The operon may have contained fewer  
218 genes than extant bacterial operons, or some shared gene losses or rearrangements may have  
219 occurred to produce a structure similar to that of *C. versatilis* in the last common ancestor of the  
220 W/S clade yeasts. Modern yeasts of this clade evolved at least four different structures through  
221 several lineage-specific rearrangements that tended to create derived gene cluster structures with  
222 more eukaryotic characteristics, including increasing the size of the intergenic regions, splitting  
223 the gene cluster in two in *C. apicola*, and intercalating at least four eukaryotic genes. The  
224 intercalation of a gene encoding a eukaryotic ferric reductase (*FRE*), which is involved in  
225 reductive iron assimilation, between two operon genes in a subset of species offers a particularly  
226 telling example. The genetic linkage of these two mechanisms for acquiring iron shows that  
227 bacterial and eukaryotic genes can stably co-exist, and perhaps even be selected together as gene  
228 clusters for co-inheritance or co-regulation, through eukaryotic mechanisms.

229

## 230 **Discussion**

231 The horizontal transfer of this siderophore biosynthesis operon is the first clearly documented  
232 example of the acquisition of a bacterial operon by a eukaryotic lineage. Several examples of  
233 horizontal gene transfer between different domains of life have been uncovered (9, 34–37), but the  
234 transfer of entire operons into eukaryotes has been merely speculated upon as an intriguing  
235 potential route of acquisition of secondary metabolism pathways (34, 38). The previous lack of

236 evidence for HOT into eukaryotes led authors to propose barriers due to pathway complexity (39)  
237 and differences in core Central Dogma processes (7, 40). Where could the transfer of the  
238 siderophore biosynthesis operon between Enterobacteriaceae and yeasts have occurred, and how  
239 could the bacterial operon have been functionally maintained in the yeasts' genomes? Eukaryotes  
240 have been proposed to acquire bacterial genes through several mechanisms, including virus-  
241 aided transmission (41), environmental stress-induced DNA damage and repair (42, 43), and a  
242 phagocytosis-based gene ratchet (44). The species that harbor the siderophore biosynthesis  
243 operon have been isolated predominantly from insects (45–47), where stable bacterial and  
244 eukaryotic communities coexist inside their guts (20). Moreover, this niche harbors diverse  
245 Enterobacteriaceae populations in which horizontal gene transfer has been reported (48, 49), and  
246 insect guts have recently been described as a “mating nest” for yeasts (50). Since  
247 Enterobacteriaceae and yeasts can conjugate directly in some cases (51), it is plausible that the  
248 last common ancestor of the W/S clade yeasts incorporated the operon from a bacterial co-  
249 inhabitant of an insect gut. Due to the intense competition for nutrients in this ecosystem,  
250 including a constant arms race with the host organism itself (52), yeasts able to make their own  
251 siderophores and sequester iron may have had a substantial advantage over those relying on  
252 siderophores produced by others.

253       Given the fundamental differences between bacterial and eukaryotic gene regulation, how  
254 could a bacterial operon have been maintained in a eukaryotic genome upon transfer? If it had  
255 not been actively expressed and functional, the genes of the operon would have been rapidly lost  
256 from the genome through neutral evolutionary processes. Although eukaryotes do not encode  
257 proteins with significant similarity to the bacterial regulator Fur that controls the expression of  
258 the bacterial *ent* genes, their iron response is governed by transcription factors that also belong to  
259 the GATA family. Indeed, the consensus Fur-binding site (5'-GATAAT-3') is remarkably

260 similar to that of the fungal transcriptional factors that respond to iron (5'-WGATAA-3') (19,  
261 53). This similarity suggests the intriguing possibility that the siderophore genes could have  
262 readily switched from being regulated by a bacterial transcription factor to a eukaryotic  
263 transcription factor, at least for the most 5' promoter. Siderophores are potent chelators that can  
264 efficiently sequester iron even at low concentrations (54), so even a low basal expression level of  
265 the newly acquired bacterial genes could have been enough to convey a considerable selective  
266 advantage. This initial eukaryotic expression, perhaps aided by noisy transcriptional and  
267 translation processes that include leaky scanning and internal ribosome entry sites (IRESs), could  
268 then have been optimized by acquiring more eukaryotic characteristics, such as longer intergenic  
269 regions that were gradually refined into promoters, distinct polyadenylation sites, and a shift  
270 from polycistronic to bicistronic and eventually to primarily monocistronic transcripts. The  
271 incorporation of a eukaryotic gene encoding a ferric reductase would have further improved the  
272 efficiency of iron acquisition in the highly competitive ecological niche of insect guts, while  
273 enhancing the eukaryotic characteristics of the gene cluster. Our HOT finding dramatically  
274 expands the boundaries of the cross-domain gene flow. The transfer, maintenance, expression,  
275 and adaptation of a multi-gene bacterial operon to a eukaryotic host underscore the flexibility of  
276 transcriptional and translational systems to produce adaptive changes from novel and unexpected  
277 sources of genetic information.

278

## 279 **References and Notes:**

1. T. Blumenthal, K. S. Gleason, *Caenorhabditis elegans* operons: form and function. *Nat. Rev. Genet.* **4**, 112–120 (2003).

2. J. Spieth, G. Brooke, S. Kuersten, K. Lea, T. Blumenthal, Operons in *C. elegans*: polycistronic mRNA precursors are processed by trans-splicing of SL2 to downstream coding regions. *Cell*. **73**, 521–532 (1993).
3. A. E. Vandenberghe, T. H. Meedel, K. E. M. Hastings, mRNA 5'-leader trans-splicing in the chordates. *Genes Dev*. **15**, 294–303 (2001).
4. P. Ganot, T. Kallesøe, R. Reinhardt, D. Chourrout, E. M. Thompson, Spliced-Leader RNA trans Splicing in a Chordate, *Oikopleura dioica*, with a Compact Genome. *Mol. Cell. Biol*. **24**, 7795–7805 (2004).
5. M. V. Omelchenko, K. S. Makarova, Y. I. Wolf, I. B. Rogozin, E. V. Koonin, Evolution of mosaic operons by horizontal gene transfer and gene displacement in situ. *Genome Biol*. **4**, R55 (2003).
6. J. G. Lawrence, J. R. Roth, Selfish Operons: Horizontal Transfer May Drive the Evolution of Gene Clusters. *Genetics*. **143**, 1843–1860 (1996).
7. P. J. Keeling, J. D. Palmer, Horizontal gene transfer in eukaryotic evolution. *Nat. Rev. Genet*. **9**, 605–618 (2008).
8. S. M. Soucy, J. Huang, J. P. Gogarten, Horizontal gene transfer: building the web of life. *Nat. Rev. Genet*. **16**, 472–482 (2015).
9. W. G. Alexander, J. H. Wisecaver, A. Rokas, C. T. Hittinger, Horizontally acquired genes in early-diverging pathogenic fungi enable the use of host nucleosides and nucleotides. *Proc. Natl. Acad. Sci. U. S. A*. **113**, 4116–4121 (2016).

10. T. A. Richards, D. M. Soanes, M. D. M. Jones, O. Vasieva, G. Leonard, K. Paszkiewicz, P. G. Foster, N. Hall, N. J. Talbot, Horizontal gene transfer facilitated the evolution of plant parasitic mechanisms in the oomycetes. *Proc. Natl. Acad. Sci. U. S. A.* **108**, 15258–15263 (2011).
11. J. C. Slot, A. Rokas, Horizontal Transfer of a Large and Highly Toxic Secondary Metabolic Gene Cluster between Fungi. *Curr. Biol.* **21**, 134–139 (2011).
12. S. C. Andrews, A. K. Robinson, F. Rodríguez-Quñones, Bacterial iron homeostasis. *FEMS Microbiol. Rev.* **27**, 215–237 (2003).
13. A. Sheftel, O. Stehling, R. Lill, Iron–sulfur proteins in health and disease. *Trends Endocrinol. Metab.* **21**, 302–314 (2010).
14. R. Sutak, E. Lesuisse, J. Tachezy, D. R. Richardson, Crusade for iron: iron uptake in unicellular eukaryotes and its significance for virulence. *Trends Microbiol.* **16**, 261–268 (2008).
15. D. H. Scharf, T. Heinekamp, A. A. Brakhage, Human and Plant Fungal Pathogens: The Role of Secondary Metabolites. *PLOS Pathog.* **10**, e1003859 (2014).
16. E. P. Skaar, The battle for iron between bacterial pathogens and their vertebrate hosts. *PLoS Pathog.* **6**, e1000949 (2010).
17. I. K. Toth, L. Pritchard, P. R. J. Birch, Comparative Genomics Reveals What Makes An Enterobacterial Plant Pathogen. *Annu. Rev. Phytopathol.* **44**, 305–336 (2006).

18. C. Wandersman, P. Delepelaire, Bacterial Iron Sources: From Siderophores to Hemophores. *Annu. Rev. Microbiol.* **58**, 611–647 (2004).
19. H. Haas, M. Eisendle, B. G. Turgeon, Siderophores in fungal physiology and virulence. *Annu. Rev. Phytopathol.* **46**, 149–187 (2008).
20. M. Gilliam, Identification and roles of non-pathogenic microflora associated with honey bees. *FEMS Microbiol. Lett.* **155**, 1–10 (1997).
21. C. T. Walsh, J. Liu, F. Rusnak, M. Sakaitani, Molecular studies on enzymes in chorismate metabolism and the enterobactin biosynthetic pathway. *Chem. Rev.* **90**, 1105–1129 (1990).
22. A. Levin-Karp, U. Barenholz, T. Bareia, M. Dayagi, L. Zelcbuch, N. Antonovsky, E. Noor, R. Milo, Quantifying Translational Coupling in E. coli Synthetic Operons Using RBS Modulation and Fluorescent Reporters. *ACS Synth. Biol.* **2**, 327–336 (2013).
23. S. Okuda, S. Kawashima, K. Kobayashi, N. Ogasawara, M. Kanehisa, S. Goto, Characterization of relationships between transcriptional units and operon structures in *Bacillus subtilis* and *Escherichia coli*. *BMC Genomics.* **8**, 48 (2007).
24. L. David, W. Huber, M. Granovskaia, J. Toedling, C. J. Palm, L. Bofkin, T. Jones, R. W. Davis, L. M. Steinmetz, A high-resolution map of transcription in the yeast genome. *Proc. Natl. Acad. Sci.* **103**, 5320–5325 (2006).
25. V. Pelechano, W. Wei, L. M. Steinmetz, Extensive transcriptional heterogeneity revealed by isoform profiling. *Nature.* **497**, 127–131 (2013).

26. K. V. Doren, D. Hirsh, mRNAs that mature through trans-splicing in *Caenorhabditis elegans* have a trimethylguanosine cap at their 5' termini. *Mol. Cell. Biol.* **10**, 1769–1772 (1990).
27. H. Keren, G. Lev-Maor, G. Ast, Alternative splicing and evolution: diversification, exon definition and function. *Nat. Rev. Genet.* **11**, 345–355 (2010).
28. N. Khaldi, J. Collemare, M.-H. Lebrun, K. H. Wolfe, Evidence for horizontal transfer of a secondary metabolite gene cluster between fungi. *Genome Biol.* **9**, R18 (2008).
29. J. C. Slot, A. Rokas, Multiple GAL pathway gene clusters evolved independently and by different mechanisms in fungi. *Proc. Natl. Acad. Sci. U. S. A.* **107**, 10136–10141 (2010).
30. M. A. Campbell, M. Staats, J. A. L. van Kan, A. Rokas, J. C. Slot, Repeated loss of an anciently horizontally transferred gene cluster in *Botrytis*. *Mycologia.* **105**, 1126–1134 (2013).
31. R. H. Proctor, F. Van Hove, A. Susca, G. Stea, M. Busman, T. van der Lee, C. Waalwijk, A. Moretti, T. J. Ward, Birth, death and horizontal transfer of the fumonisin biosynthetic gene cluster during the evolutionary diversification of *Fusarium*. *Mol. Microbiol.* **90**, 290–306 (2013).
32. D. Leduc, A. Battesti, E. Bouveret, The hotdog thioesterase EntH (YbdB) plays a role in vivo in optimal enterobactin biosynthesis by interacting with the ArCP domain of EntB. *J. Bacteriol.* **189**, 7112–7126 (2007).
33. J. W. Taylor, M. L. Berbee, Dating divergences in the Fungal Tree of Life: review and new analyses. *Mycologia.* **98**, 838–849 (2006).



34. D. A. Fitzpatrick, Horizontal gene transfer in fungi. *FEMS Microbiol. Lett.* **329**, 1–8 (2012).
35. J. C. D. Hotopp, M. E. Clark, D. C. S. G. Oliveira, J. M. Foster, P. Fischer, M. C. M. Torres, J. D. Giebel, N. Kumar, N. Ishmael, S. Wang, J. Ingram, R. V. Nene, J. Shepard, J. Tomkins, S. Richards, D. J. Spiro, E. Ghedin, B. E. Slatko, H. Tettelin, J. H. Werren, Widespread Lateral Gene Transfer from Intracellular Bacteria to Multicellular Eukaryotes. *Science.* **317**, 1753–1756 (2007).
36. M. Marcet-Houben, T. Gabaldón, Acquisition of prokaryotic genes by fungal genomes. *Trends Genet.* **26**, 5–8 (2010).
37. T. A. Richards, J. B. Dacks, J. M. Jenkinson, C. R. Thornton, N. J. Talbot, Evolution of Filamentous Plant Pathogens: Gene Exchange across Eukaryotic Kingdoms. *Curr. Biol.* **16**, 1857–1864 (2006).
38. B. J. Weigel, S. G. Burgett, V. J. Chen, P. L. Skatrud, C. A. Frolik, S. W. Queener, T. D. Ingolia, Cloning and expression in *Escherichia coli* of isopenicillin N synthetase genes from *Streptomyces lipmanii* and *Aspergillus nidulans*. *J. Bacteriol.* **170**, 3817–3826 (1988).
39. J. H. Wisecaver, A. Rokas, Fungal metabolic gene clusters-caravans traveling across genomes and environments. *Front. Microbiol.* **6**, 161 (2015).
40. T. A. Richards, G. Leonard, D. M. Soanes, N. J. Talbot, Gene transfer into the fungi. *Fungal Biol. Rev.* **25**, 98–110 (2011).

41. A. Routh, T. Domitrovic, J. E. Johnson, Host RNAs, including transposons, are encapsidated by a eukaryotic single-stranded RNA virus. *Proc. Natl. Acad. Sci.* **109**, 1907–1912 (2012).
42. J.-F. Flot, B. Hespels, X. Li, B. Noel, I. Arkhipova, E. G. J. Danchin, A. Hejnol, B. Henrissat, R. Koszul, J.-M. Aury, V. Barbe, R.-M. Barthélémy, J. Bast, G. A. Bazykin, O. Chabrol, A. Couloux, M. Da Rocha, C. Da Silva, E. Gladyshev, P. Gouret, O. Hallatschek, B. Hecox-Lea, K. Labadie, B. Lejeune, O. Piskurek, J. Poulain, F. Rodriguez, J. F. Ryan, O. A. Vakhrusheva, E. Wajnberg, B. Wirth, I. Yushenova, M. Kellis, A. S. Kondrashov, D. B. Mark Welch, P. Pontarotti, J. Weissenbach, P. Wincker, O. Jaillon, K. Van Doninck, Genomic evidence for ameiotic evolution in the bdelloid rotifer *Adineta vaga*. *Nature*. **500**, 453–457 (2013).
43. E. A. Gladyshev, M. Meselson, I. R. Arkhipova, Massive Horizontal Gene Transfer in Bdelloid Rotifers. *Science*. **320**, 1210–1213 (2008).
44. W. F. Doolittle, You are what you eat: a gene transfer ratchet could account for bacterial genes in eukaryotic nuclear genomes. *Trends Genet.* **14**, 307–311 (1998).
45. M.-A. Lachance, W. T. Starmer, C. A. Rosa, J. M. Bowles, J. S. F. Barker, D. H. Janzen, Biogeography of the yeasts of ephemeral flowers and their insects. *FEMS Yeast Res.* **1**, 1–8 (2001).
46. C. A. Rosa, M.-A. Lachance, The yeast genus *Starmerella* gen. nov. and *Starmerella bombicola* sp. nov., the teleomorph of *Candida bombicola* (Spencer, Gorin & Tullock) Meyer & Yarrow. *Int. J. Syst. Evol. Microbiol.* **48**, 1413–1417 (1998).

47. C. A. Rosa, M. A. Lachance, J. O. C. Silva, A. C. P. Teixeira, M. M. Marini, Y. Antonini, R. P. Martins, Yeast communities associated with stingless bees. *FEMS Yeast Res.* **4**, 271–275 (2003).
48. K. Watanabe, M. Sato, Plasmid-Mediated Gene Transfer Between Insect-Resident Bacteria, *Enterobacter cloacae*, and Plant-Epiphytic Bacteria, *Erwinia herbicola*, in Guts of Silkworm Larvae. *Curr. Microbiol.* **37**, 352–355 (1998).
49. K. Watanabe, W. Hara, M. Sato, Evidence for Growth of Strains of the Plant Epiphytic Bacterium *Erwinia herbicola* and Transconjugation among the Bacterial Strains in Guts of the Silkworm *Bombyx mori*. *J Invertebr Pathol.* **72**, 104–111 (1998).
50. I. Stefanini, L. Dapporto, L. Berná, M. Polsinelli, S. Turillazzi, D. Cavalieri, Social wasps are a *Saccharomyces* mating nest. *Proc. Natl. Acad. Sci.* **113**, 2247–2251 (2016).
51. J. A. Heinemann, G. F. Sprague, Bacterial conjugative plasmids mobilize DNA transfer between bacteria and yeast. *Nature.* **340**, 205–209 (1989).
52. M. F. Barber, N. C. Elde, Buried Treasure: Evolutionary Perspectives on Microbial Iron Piracy. *Trends Genet.* **31**, 627–636 (2015).
53. Z. Chen, K. A. Lewis, R. K. Shultzaberger, I. G. Lyakhov, M. Zheng, B. Doan, G. Storz, T. D. Schneider, Discovery of Fur binding site clusters in *Escherichia coli* by information theory models. *Nucleic Acids Res.* **35**, 6762–6777 (2007).
54. H. Boukhalfa, A. L. Crumbliss, Chemical aspects of siderophore mediated iron transport. *Biometals.* **15**, 325–339 (2002).

55. S. F. Altschul, W. Gish, W. Miller, E. W. Myers, D. J. Lipman, Basic local alignment search tool. *J. Mol. Biol.* **215**, 403–410 (1990).
56. C. T. Hittinger, P. Gonçalves, J. P. Sampaio, J. Dover, M. Johnston, A. Rokas, Remarkably ancient balanced polymorphisms in a multi-locus gene network. *Nature*. **464**, 54–58 (2010).
57. X. Zhou, D. Peris, J. Kominek, C. P. Kurtzman, C. T. Hittinger, A. Rokas, in silico Whole Genome Sequencer & Analyzer (iWGS): A Computational Pipeline to Guide the Design and Analysis of de novo Genome Sequencing Studies. *G3*. **6**, 3655–3662 (2016).
58. A. Gurevich, V. Saveliev, N. Vyahhi, G. Tesler, QUAST: quality assessment tool for genome assemblies. *Bioinformatics*. **29**, 1072–1075 (2013).
59. C. Holt, M. Yandell, MAKER2: an annotation pipeline and genome-database management tool for second-generation genome projects. *BMC Bioinformatics*. **12**, 491 (2011).
60. V. Ter-Hovhannisyanyan, A. Lomsadze, Y. O. Chernoff, M. Borodovsky, Gene prediction in novel fungal genomes using an ab initio algorithm with unsupervised training. *Genome Res*. **18**, 1979–1990 (2008).
61. M. Stanke, M. Diekhans, R. Baertsch, D. Haussler, Using native and syntenically mapped cDNA alignments to improve de novo gene finding. *Bioinformatics*. **24**, 637–644 (2008).
62. I. Korf, Gene finding in novel genomes. *BMC Bioinformatics*. **5**, 59 (2004).
63. X.-X. Shen, X. Zhou, J. Kominek, C. P. Kurtzman, C. T. Hittinger, A. Rokas, Reconstructing the Backbone of the Saccharomycotina Yeast Phylogeny Using Genome-Scale Data. *G3*. **6**, 3927–3939 (2016).

64. F. A. Simão, R. M. Waterhouse, P. Ioannidis, E. V. Kriventseva, E. M. Zdobnov, BUSCO: assessing genome assembly and annotation completeness with single-copy orthologs. *Bioinformatics*. **31**, 3210–3212 (2015).
65. K. Katoh, D. M. Standley, MAFFT multiple sequence alignment software version 7: improvements in performance and usability. *Mol. Biol. Evol.* **30**, 772–780 (2013).
66. A. Stamatakis, RAxML version 8: a tool for phylogenetic analysis and post-analysis of large phylogenies. *Bioinformatics*. **30**, 1312–1313 (2014).
67. S. Q. Le, O. Gascuel, An improved general amino acid replacement matrix. *Mol. Biol. Evol.* **25**, 1307–1320 (2008).
68. A. M. Kozlov, A. J. Aberer, A. Stamatakis, ExaML version 3: a tool for phylogenomic analyses on supercomputers. *Bioinformatics*. **31**, 2577–2579 (2015).
69. L.-T. Nguyen, H. A. Schmidt, A. von Haeseler, B. Q. Minh, IQ-TREE: a fast and effective stochastic algorithm for estimating maximum-likelihood phylogenies. *Mol. Biol. Evol.* **32**, 268–274 (2015).
70. P. Chomczynski, N. Sacchi, Single-step method of RNA isolation by acid guanidinium thiocyanate-phenol-chloroform extraction. *Anal. Biochem.* **162**, 156–159 (1987).
71. T. D. Wu, S. Nacu, Fast and SNP-tolerant detection of complex variants and splicing in short reads. *Bioinformatics*. **26**, 873–881 (2010).
72. M. G. Grabherr, B. J. Haas, M. Yassour, J. Z. Levin, D. A. Thompson, I. Amit, X. Adiconis, L. Fan, R. Raychowdhury, Q. Zeng, Z. Chen, E. Mauceli, N. Hacohen, A.

- Gnrirke, N. Rhind, F. di Palma, B. W. Birren, C. Nusbaum, K. Lindblad-Toh, N. Friedman, A. Regev, Full-length transcriptome assembly from RNA-Seq data without a reference genome. *Nat. Biotechnol.* **29**, 644–652 (2011).
73. M. Pertea, G. M. Pertea, C. M. Antonescu, T.-C. Chang, J. T. Mendell, S. L. Salzberg, StringTie enables improved reconstruction of a transcriptome from RNA-seq reads. *Nat. Biotechnol.* **33**, 290–295 (2015).
74. S. Pérez-Miranda, N. Cabirol, R. George-Téllez, L. S. Zamudio-Rivera, F. J. Fernández, O-CAS, a fast and universal method for siderophore detection. *J. Microbiol. Methods.* **70**, 127–131 (2007).

280

281 **Acknowledgments:**

282 We thank David J. Eide and Michael D. Bucci for advice on low-iron media; Nicole T. Perna  
283 and Jeremy D. Glasner for *E. coli* strain MG1655; the Eide, Perna, Rokas and Hittinger labs for  
284 comments and discussions; RIKEN for publicly releasing 20 genome sequences; Lucigen  
285 Corporation (Middleton, WI) for use of their Covaris for gDNA sonication; and the University of  
286 Wisconsin Biotechnology Center DNA Sequencing Facility for providing Illumina sequencing  
287 facilities and services. This work was conducted in part using the computational resources of the  
288 Wisconsin Energy Institute and the Center for High-Throughput Computing at the University of  
289 Wisconsin-Madison. This material is based upon work supported by the National Science  
290 Foundation under Grant Nos. DEB-1442113 (to A.R.) and DEB-1442148 (to C.T.H. and C.P.K.),  
291 in part by the DOE Great Lakes Bioenergy Research Center (DOE Office of Science BER DE-  
292 FC02-07ER64494 to Timothy J. Donohue), the USDA National Institute of Food and

293 Agriculture (Hatch Project 1003258 to C.T.H.), and the National Institutes of Health (NIAID  
294 AI105619 to A.R.). C.T.H. is a Pew Scholar in the Biomedical Sciences, supported by the Pew  
295 Charitable Trusts. D.T.D. is supported by a NHGRI training grant to the Genomic Sciences  
296 Training Program (5T32HG002760). Mention of trade names or commercial products in this  
297 publication is solely for the purpose of providing specific information and does not imply  
298 recommendation or endorsement by the U.S. Department of Agriculture. USDA is an equal  
299 opportunity provider and employer.

300 Raw DNA and RNA sequencing data were deposited in GenBank under Bioproject ID  
301 PRJNA396763. Whole Genome Shotgun assemblies have been deposited at  
302 DDBJ/ENA/GenBank under the accessions NRDR000000000-NREI000000000. The versions  
303 described in this paper are versions NRDR010000000-NREI010000000.

304 Author contributions: J.K. (study design, genome assembly, annotation, phylogenetic  
305 analyses, RNA-seq data analysis, text); D.T.D. (study design, CAS assays, RNA isolation and  
306 strand-specific library preparation, text); D.A.O., J.D., and A.B.H. (genomic DNA isolation and  
307 library preparation); X.S and X.Z. (preliminary genomic analyses); and C. P. K., A.R., and  
308 C.T.H. (study design, text).

309

### 310 **List of Supplementary Materials:**

311 Materials and Methods

312 Figures S1-S5

313 Captions for Tables S1-S6 (separate files)

314

315

316 **Figures:**

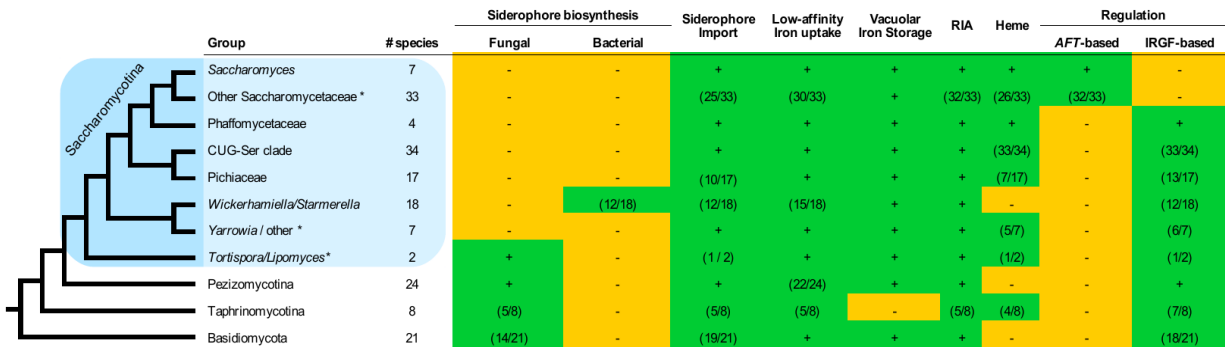

317 **Fig. 1. Distribution of the iron uptake and storage systems among fungi.**

318 Plus (green) and minus (orange) signs indicate the presence and absence of iron uptake and  
 319 storage systems in specific taxonomic groups. The numbers in parentheses (green) indicate the  
 320 number of species in a taxonomic group that possess a specific system, if it is not ubiquitous in  
 321 that group. Blue box indicates the budding yeasts. RIA - Reductive Iron Assimilation. IRGF –  
 322 Iron-Responsive GATA Factor. For details about specific taxa and individual genes see Table  
 323 S2. Asterisks (\*) mark paraphyletic groups. Note that only *Wickerhamiella/Starmerella* (W/S)  
 324 clade fungi contain the bacterial or catecholate-class siderophore biosynthesis pathway.

325

326

327



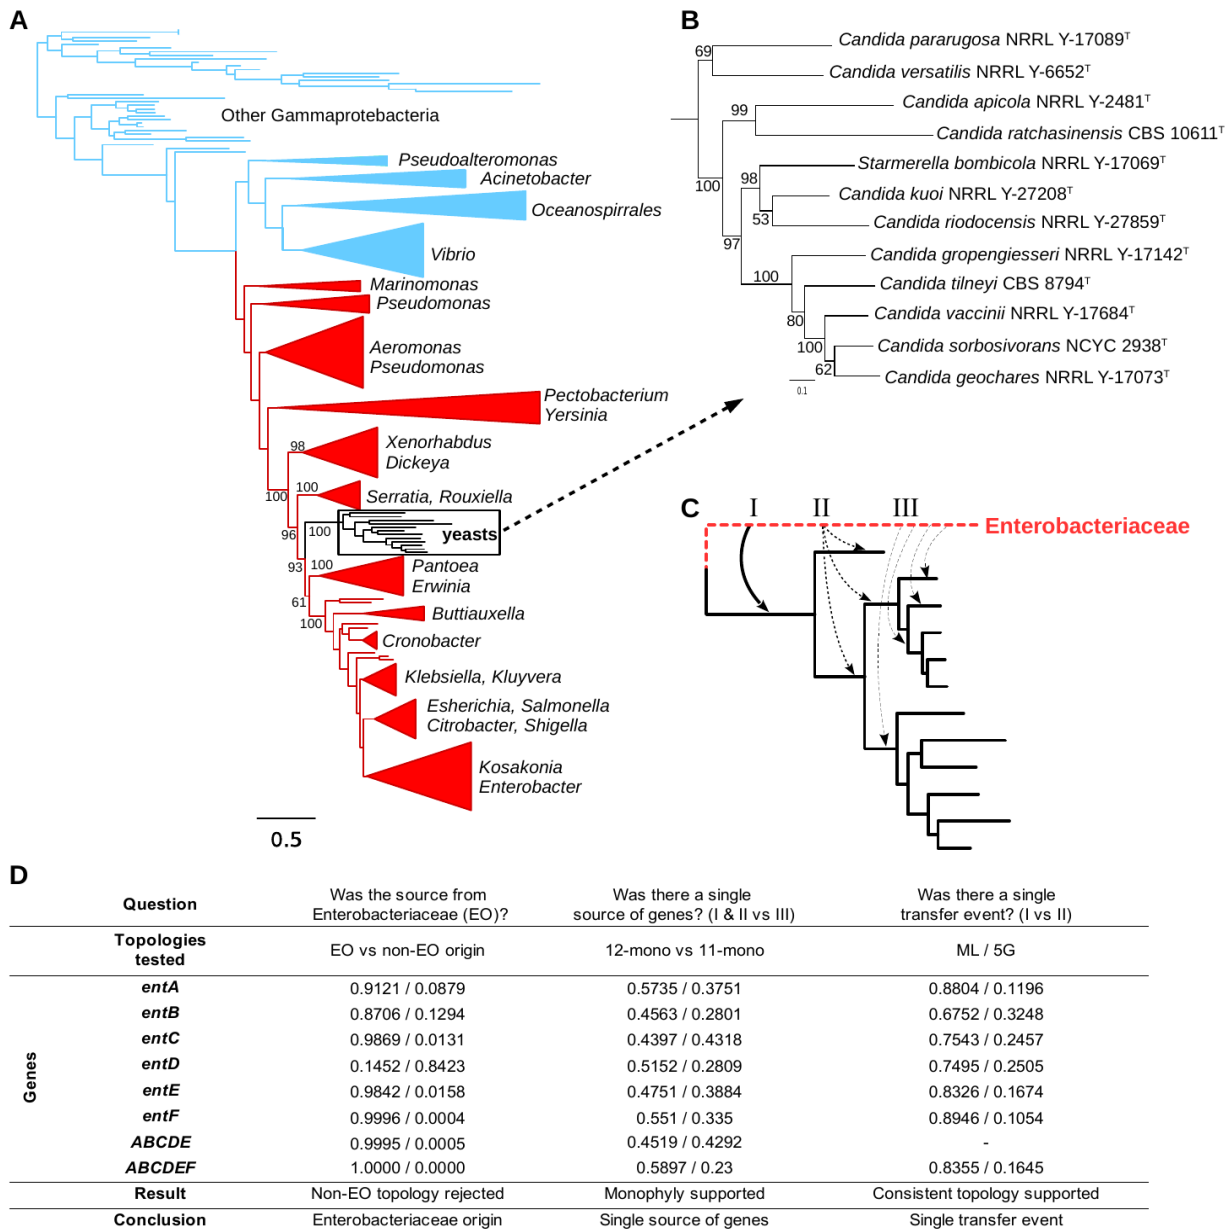

328

329 **Fig. 2. Yeast siderophore biosynthesis originated from an Enterobacteriaceae lineage.**

330 (B) ML phylogeny from the super-alignment of *entABCDE* genes from 207

331 Gammaproteobacteria and 12 yeasts, rooted at the midpoint. Bootstrap support values are shown

332 for relevant branches within the Enterobacteriaceae (red). Other Gammaproteobacteria are green.

333 (B) Detailed view of the yeast clade from the main phylogeny, with bootstrap supports. (C)

334 Alternative scenarios for the horizontal operon transfer. (D) P-values of the AU test of different  
335 evolutionary hypotheses tested in this study; EO – Enterobacteriaceae origin; non-EO – non-  
336 Enterobacteriaceae origin; 12-mono - 12 yeast sequences are monophyletic, 11-mono - 11 yeast  
337 sequences monophyletic and one unconstrained (12 alternatives tested, lowest p-value shown,  
338 full details in Table S5); 5G – topology of the yeast clade constrained to the one inferred from  
339 the super-alignment of *entABCDE* genes.

340

341

342

343

344

345

346

347

348

349

350

351

352

353

354

355

356

357

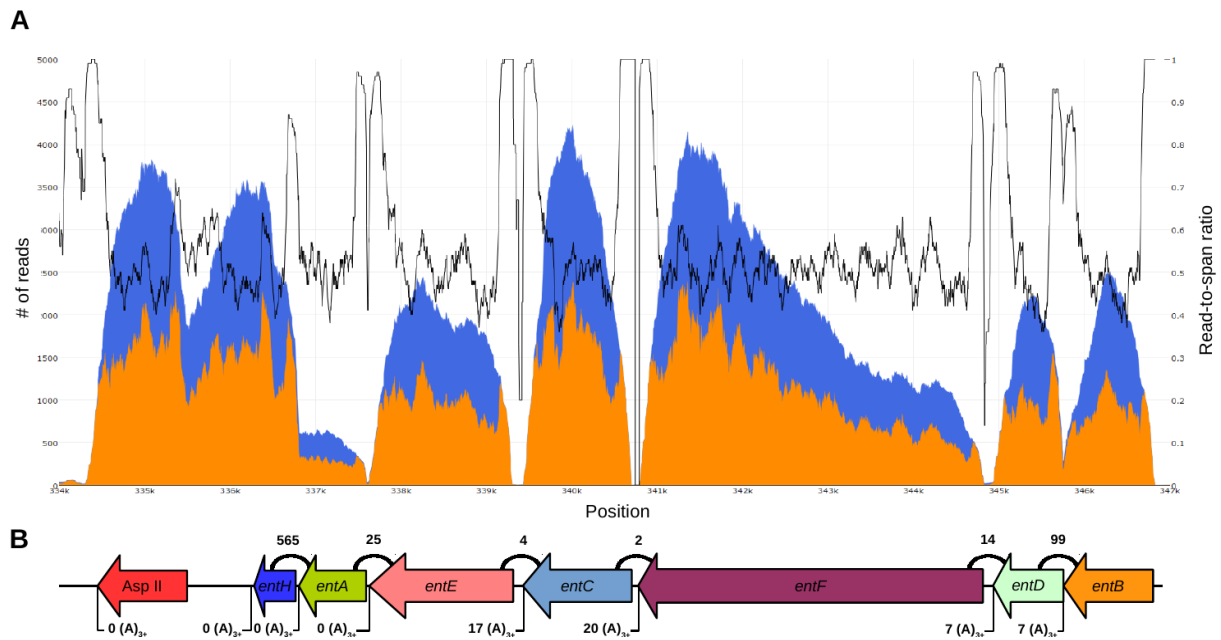

358

359 **Fig. 3. Transcriptomics of the siderophore biosynthesis genes in *C. versatilis*.**

360 (A) The orange area indicates per-base coverage by RNA-seq reads (read coverage). The blue  
361 area indicates per-base cumulative coverage by RNA-seq reads and inserts between read pairs  
362 (span coverage). The black line indicates the ratio of the read coverage over the span coverage,  
363 which is expected to remain ~50% in the middle of gene transcripts and rise towards 100% at  
364 transcript termini. The expected 3' coverage bias can be observed for individual transcripts in the  
365 raw coverage data.

366 (B) Diagram of siderophore biosynthesis genes in the *C. versatilis* genome, drawn to scale, as  
367 well as a gene encoding a class II asparaginase adjacent on the 3' end. Counts above indicate  
368 read pairs cross-mapping between genes. Counts below indicate reads containing putative  
369 poly(A) tails.

370

371

372

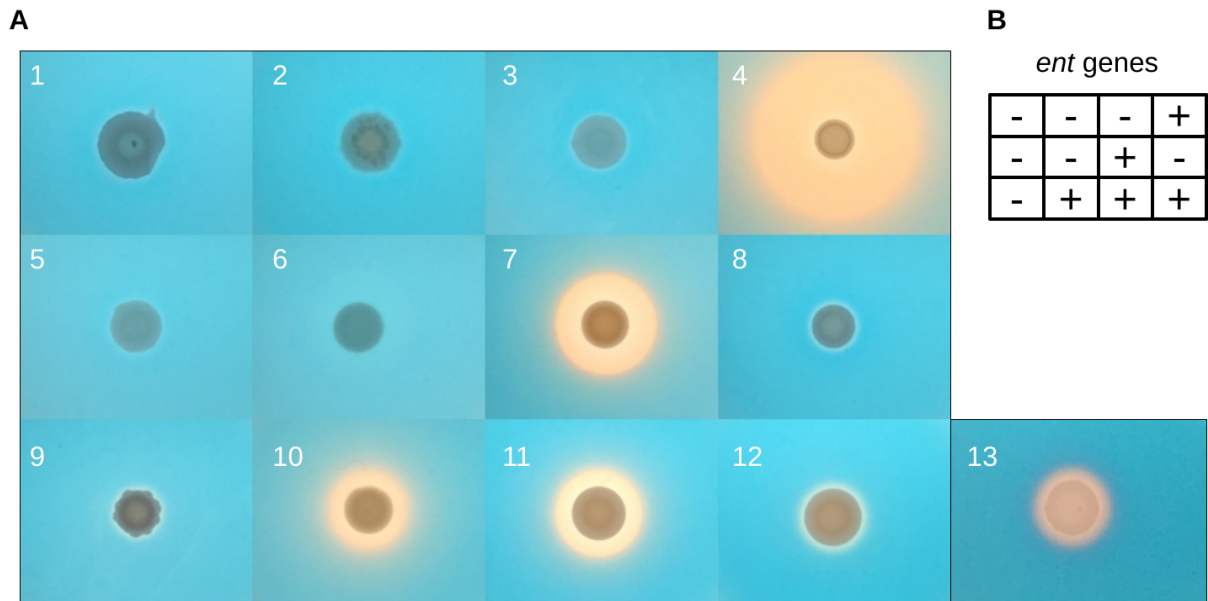

373

374 **Fig. 4. Siderophore production by yeasts from the *Starmerella/Wickerhamiella* clade.**

375 (A) CAS-based overlay assay of siderophore production. Under normal conditions, the medium  
376 remains blue, but in the presence of an iron chelator, it changes color from blue to orange.

377 Species legend: (1) *Saccharomyces cerevisiae* FM1282, (2) *Yarrowia lipolytica* NRRL YB-423<sup>T</sup>,

378 (3) *Candida hasegawae*, (4) *Candida pararugosa*, (5) *Wickerhamiella cacticola*, (6)

379 *Wickerhamiella domercqiae*, (7) *Candida versatilis*, (8) *Candida davenportii*, (9) *Candida*

380 *apicola*, (10) *Candida riodecensis*, (11) *Candida kuoi*, (12) *Starmerella bombicola*, (13)

381 *Escherichia coli* MG1655 (positive control). Results of the CAS assay for all analyzed species

382 can be found in Fig. S5. (B) Distribution of siderophore biosynthesis genes in the genomes of

383 species depicted in panel A.

384

385

386

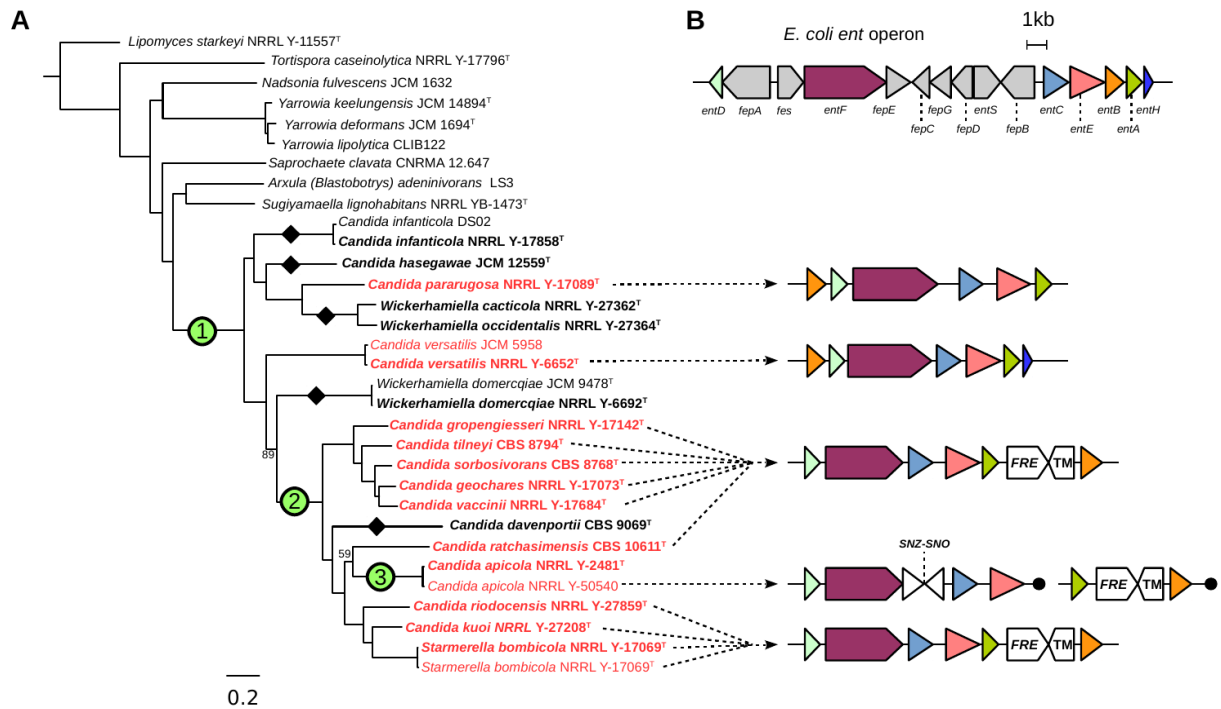

387

388 **Fig. 5. Evolution of the siderophore biosynthesis genes in yeasts.**

389 (A) ML phylogeny reconstructed from the concatenated alignment of 661 conserved, single copy  
 390 genes (834,750 sites), with branch supports below 100 shown. Species in bold denote genomes  
 391 sequenced in this study, while species in red denote genomes containing the siderophore  
 392 biosynthesis genes. Black diamonds indicate secondary losses in yeast lineages, accompanied by  
 393 losses of the siderophore importer *ARN* genes, which are often found in close proximity. (1)  
 394 Horizontal operon transfer from an Enterobacteriaceae lineage. (2) Rearrangement and  
 395 integration of genes encoding ferric reductase (*FRE*) and an uncharacterized transmembrane  
 396 protein (*TM*). (3) Disruption by integration of the *SNZ-SNO* gene pair and translocation. (B)  
 397 Genetic structure of the siderophore biosynthesis operon in *E. coli* and yeasts. Individual colors

398 represent homologous ORFs, drawn to scale, and gray marks genes not found in yeasts. Black  
399 circles represent contig termini within 25kb.

## 400 **Supplementary Materials:**

### 401 **Materials and Methods**

#### 402 **Identification of genes involved in iron uptake and storage**

403 Amino acid sequences of proteins known to be involved in iron uptake and storage were used  
404 as BLASTP and TBLASTN v2.2.28+ (55) queries against genomes and proteomes of a broad  
405 range of fungal species (see Table S1 for complete list of proteins and genomes). The genomic  
406 data was obtained from GenBank as well as from draft genome assemblies generated for 20  
407 strains by the RIKEN BioResource Center and RIKEN Center for Life Science Technologies  
408 through the Genome Information Upgrading Program of the National Bio-Resource Project of  
409 the MEXT. *S. cerevisiae* homologs were used, except for the fungal hydroxamate-class  
410 siderophore biosynthesis proteins, which came from *A. nidulans*; the bacterial catecholate-class  
411 siderophore biosynthesis proteins, which came from *E. coli*; and the iron-responsive GATA  
412 factor sequences, which came from *A. nidulans*, *Ustilago maydis*, *Phanerochate chrysosporium*,  
413 *Neurospora crassa*, *Candida albicans*, and *Schizosaccharomyces pombe*. Identification of *entA*-  
414 *entF* genes in bacterial genomes was performed using *E. coli* protein sequences as queries for  
415 BLASTP and TBLASTN to search all 1,382 Enterobacteriaceae genomes and proteomes  
416 downloaded from GenBank. Only genes from the 207 genomes where all six genes could be  
417 identified at E-value cutoff of 1E-10 were considered for further phylogenetic analyses.

418

#### 419 **Genome sequencing, assembly, and annotation**

420 Yeast strains were obtained from the USDA Agricultural Research Service (ARS) NRRL  
421 Culture Collection in Peoria, Illinois, USA. Genomic DNA (gDNA) was isolated from individual  
422 strains, sonicated and ligated to Illumina sequencing adaptors as previously described (56). The  
423 paired-end libraries were submitted for 2x250bp sequencing on an Illumina HiSeq 2500  
424 instrument. To generate whole-genome assemblies, Illumina reads were used as input to the  
425 meta-assembler pipeline iWGS v1.01 (57). Briefly, this pipeline performed quality-based read  
426 trimming, followed by k-mer length optimization, and used a range of state-of-the-art assemblers  
427 to generate multiple genome assemblies. Assembly quality was assessed using QUASt v4.4  
428 (58), and the best assembly for each species was chosen based on the N<sub>50</sub> statistic. Open reading  
429 frames were annotated in genomes using the MAKER pipeline v2 (59) and the GeneMark-ES  
430 v4.10 (60), Augustus v3.2.1 (61), and SNAP (release 2006-07-28) (62) gene predictors.

431

#### 432 **Phylogenetic reconstruction and topology tests**

433 The species phylogeny was obtained by analyzing conserved single-copy fungal orthologs by  
434 using a previously described phylogenomic approach (63). Briefly, sequences of conserved,  
435 single-copy orthologous genes were identified in the genome assemblies using the BUSCO v3  
436 software (64), single-copy BUSCO genes shared by at least 80% of species were aligned using  
437 MAFFT v7 (65), and these orthologs were used for maximum-likelihood phylogenetic

438 reconstruction with RAxML v8 (66). The reconstruction was performed under the LG model of  
439 amino acid substitution (67) with empirical amino acid frequencies, four gamma distribution rate  
440 categories to estimate rate heterogeneity, and 100 rapid bootstrap pseudoreplicates. A  
441 concatenated super-alignment of all genes was also used for phylogenetic reconstruction by  
442 running ExaML v3.0.18 (68) under the JTT substitution matrix (chosen by the built-in  
443 maximum-likelihood model selection), per-site rate heterogeneity model with median  
444 approximation of the GAMMA rates, and with memory saving option for gappy alignments  
445 turned on. Constrained phylogeny reconstructions were conducted in RAxML through the “-g”  
446 option, and the AU topology tests were performed with IQ-TREE v1.5.4 (69) using 10,000  
447 bootstrap pseudoreplicates.

448 Three evolutionary scenarios were considered to explain the course of the horizontal transfer  
449 event: (I) single-source, single-target; (II) single-source, multiple-targets; (III) and multiple-  
450 sources. Scenario I predicted that the yeast sequences would form a strongly-supported  
451 monophyletic group with a consistent internal topology. Scenario II predicted that yeast  
452 sequences would form a strongly-supported monophyletic group but not follow a consistent  
453 internal topology. Scenario III predicted that yeast sequences would not form a monophyletic  
454 group.

455

#### 456 **RNA sequencing and transcriptomics analyses**

457 Cells were grown in quadruplicates for either 3 or 6 days on YPD agar, and RNA was  
458 extracted using the hot acid phenol protocol (70). Extracts were then treated with DNase to  
459 remove any residual DNA prior to treatment with the RNA Clean & Concentrator kit (Zymo  
460 Research #R1017, R1018). Total RNA yields were quantified with the Qubit RNA Assay Kit  
461 (Thermo Fisher). Next, mRNA was isolated and converted to cDNA using the NEBNext Poly(A)  
462 mRNA Magnetic Isolation Module (NEB #E7490) and prepared into Illumina libraries using the  
463 NEBNext Multiplex Oligos for Illumina (New England Biolabs #E7335, E7500). Library quality  
464 was assessed by gel electrophoresis and with the Qubit dsDNA Kit (Thermo Fisher) prior to  
465 submission for 2x125 paired-end sequencing with an Illumina HiSeq 2500 instrument. Reads  
466 were mapped to their respective genome assemblies using GSNAP (71) from the GMAP package  
467 (release date 2017-05-08) with the novel splicing site search option enabled. *De novo*  
468 transcriptome assembly was performed using the Trinity pipeline v2.4.0 (72), which was run in  
469 the RF strand-specific mode with the jaccard-clip option enabled. Transcript abundance of  
470 siderophore biosynthesis genes were estimated using StringTie v1.3.3b (73).

471 Evidence of transcriptional processing was evaluated by inspecting parts of the RNA-Seq  
472 reads that were soft-clipped from the ends of reads during the mapping step. 3' ends were  
473 inspected for evidence of poly(A) tails of at least three consecutive As or Ts, which were not  
474 encoded in the genome. The power of such analysis is limited by the fact that only small fraction  
475 of reads (~0.05%) are expected to be initiated using the (A)<sub>6</sub> or (T)<sub>6</sub> primers, which increases the  
476 rate of false negative results, but true positive results remain unaffected. With the above caveat,  
477 we note that evidence of poly(A) tails was not detected from the *C. versatilis entE*, *entA*, and  
478 *entH* genes. 5' ends were inspected for presence of common sequences, encoded elsewhere in the  
479 genome, which could have been indicative of splicing leaders (in case of trans-splicing) or  
480 cassette exons (in case of alternative cis-splicing).

481

## 482 **Microbial culturing and chromeazurol S overlay (O-CAS) assays**

483 Low-iron synthetic complete (SC) medium consisted of 5 g/L ammonium sulfate, 1.7 g/L  
484 Yeast Nitrogen Base (without amino acids, carbohydrates, ammonium sulfate, ferric chloride, or  
485 cupric sulfate), 2 g/L complete dropout mix, 2% dextrose (added after autoclaving), and 200 nM  
486 cupric sulfate. M9 minimal medium consisted of 0.4% glucose, 2 mM magnesium sulfate, 100  
487  $\mu$ M calcium dichloride, and 1x M9 salts (added as a 5x stock solution consisting of 64g/L dibasic  
488 sodium phosphate heptahydrate, 15 g/L monobasic potassium phosphate, 2.5 g/L sodium  
489 chloride, and 5 g/L ammonium chloride in deionized water).

490 The O-CAS Assay was carried out as previously described (74), with some modifications.  
491 Specifically, 10X CAS Blue Dye was made by combining the following: 50 mL Solution 1: (60  
492 mg chromeazurol S dissolved in 50 mL deionized H<sub>2</sub>O), 9 mL Solution 2: (13.5 mg ferric  
493 chloride hexahydrate dissolved in 50 mL 10 mM hydrochloric acid) and 40 mL Solution 3: (73  
494 mg hexadecyltrimethylammonium bromide (HDTMA) in 40 mL deionized H<sub>2</sub>O). Separately,  
495 15.12 g PIPES (free acid) was added to 425 mL deionized water and adjusted to a pH of  
496 approximately 6.8 with 2.46 g sodium hydroxide. 4.5 g agarose was added as a solidifying agent,  
497 and the resulting solution was brought up to 450 mL with deionized water in a 1-L Erlenmeyer  
498 flask. To make the CAS overlay, the agarose-PIPES solution was heated to melt the agarose and  
499 added in a ratio of 9:1 to 10X CAS Blue Dye, and 6 mL of the resulting O-CAS solution were  
500 overlaid onto low-iron SC plates.

501 Yeast strains were grown to saturation in 3 mL YPD medium at 30 degrees centigrade on a  
502 rotating culture wheel, centrifuged at 3000 rpm for 5 minutes to collect the cells, and  
503 resuspended in 3 mL deionized water. A volume of 5  $\mu$ L of the resulting cell suspension was  
504 spotted onto 60 mm diameter plates containing low-iron SC medium using agarose (1% w/v) as a  
505 gelling agent and incubated at 30 degrees centigrade for 7 days before adding 6 mL of O-CAS  
506 solution. *E. coli* cells were grown overnight in M9 minimal medium at 37 degrees centigrade,  
507 and 5  $\mu$ L of culture was spotted onto low-iron SC plates that had already been overlaid with 6  
508 mL of O-CAS solution and allowed to dry for at least 1 hour. Pictures of yeast colonies were  
509 taken 2 days after the O-CAS was poured, while *E. coli* colonies were photographed 5 days after  
510 the O-CAS was poured. With exposure and focus lock enabled, pictures were taken of the plates  
511 set on top of a miniature white light trans-illuminator placed under a gel-imaging dark box.

512

513

514

515

516

517

518

519

520

521

522

523

524



525

526

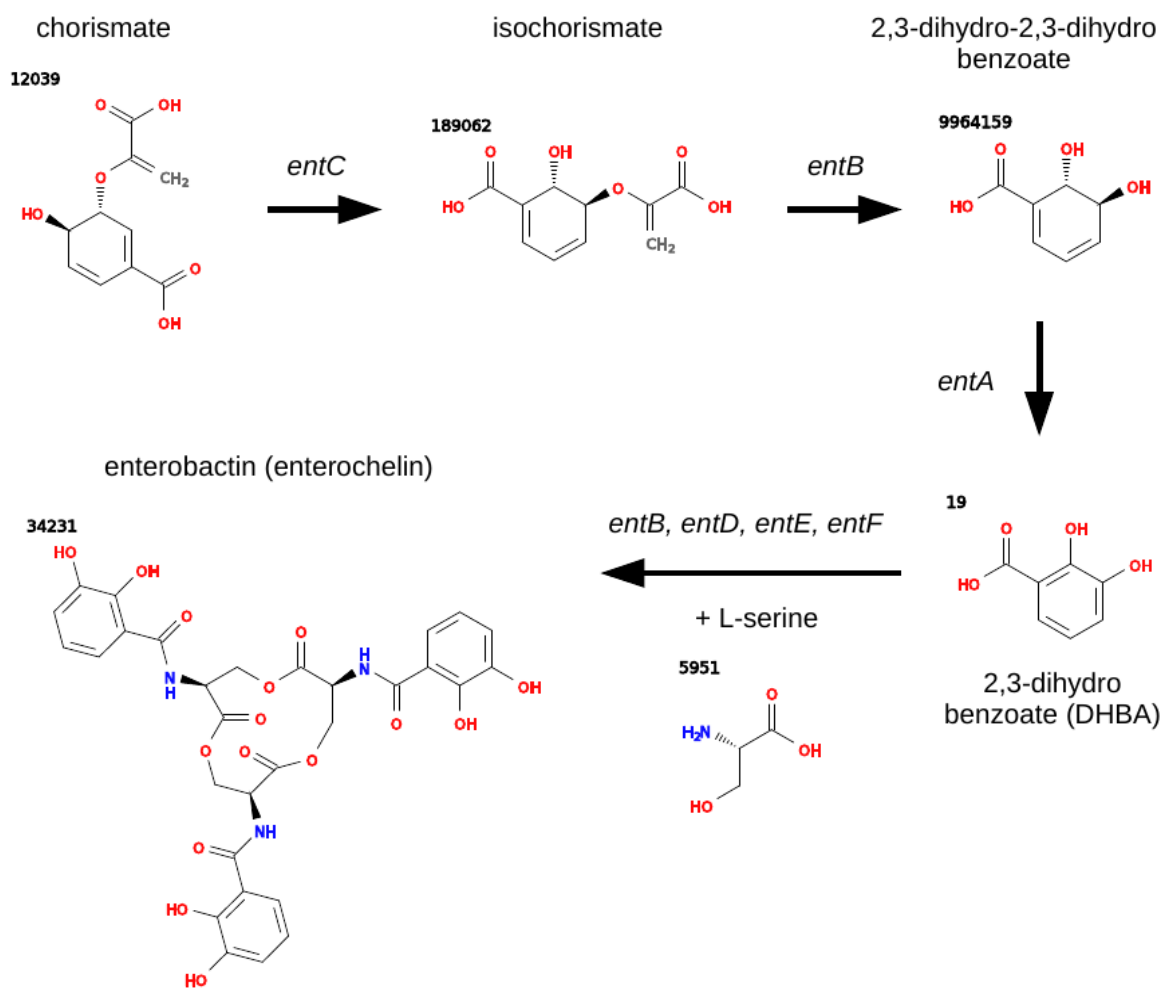

527

528 **Fig. S1. Enterobactin biosynthesis from chorismate.**

529 Genes involved at each biosynthesis step are marked above arrows. Intermediates of the final  
530 biosynthesis step have not yet been determined. PubChem IDs of individual chemical structures  
531 are marked in bold. Chorismate biosynthesis is broadly conserved because it is a key compound  
532 in the shikimate pathway that is involved in biosynthesis of aromatic amino acids. *entH* encodes  
533 a proofreading thioesterase whose activity is not required for the production of enterobactin and  
534 related catecholate-class siderophores.

535

536

537

538

539

540

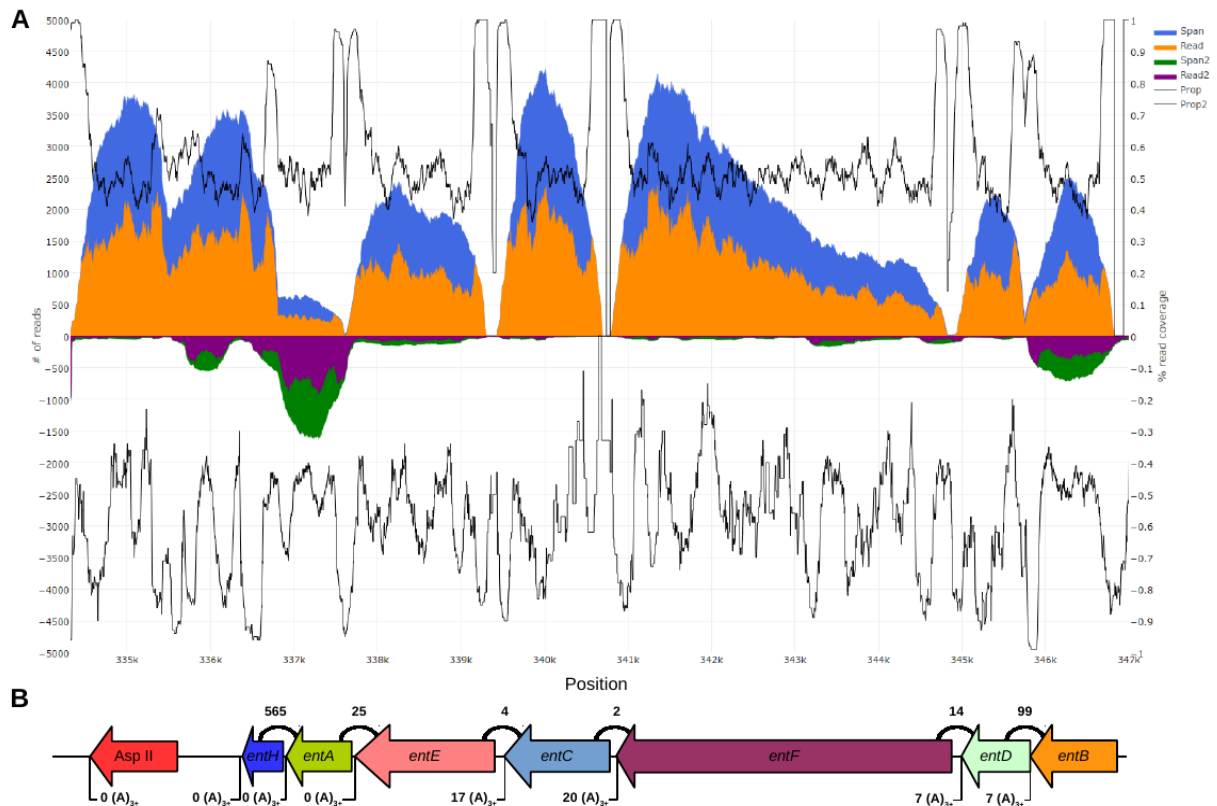

541 **Fig. S2. Transcriptomics of the siderophore biosynthesis genes in *C. versatilis***

542 (A) The orange area indicates per-base coverage by RNA-seq reads (read coverage). The blue  
 543 area indicates per-base cumulative coverage by RNA-seq reads and inserts between read pairs  
 544 (span coverage). The purple area indicates read coverage of the opposite strand. The green area  
 545 indicates span coverage of the opposite strand. The black lines indicate the ratios of the read  
 546 coverage over the span coverage data for the relevant strand. (B) Diagram of siderophore  
 547 biosynthesis genes in the *C. versatilis* genome, drawn to scale, including a bacterial class II  
 548 asparaginase downstream from the operon. Counts above indicate read pairs cross-mapping  
 549 between genes. Counts below indicate reads containing putative poly(A) tails.

550

551

552

553

554

555

556

557

558

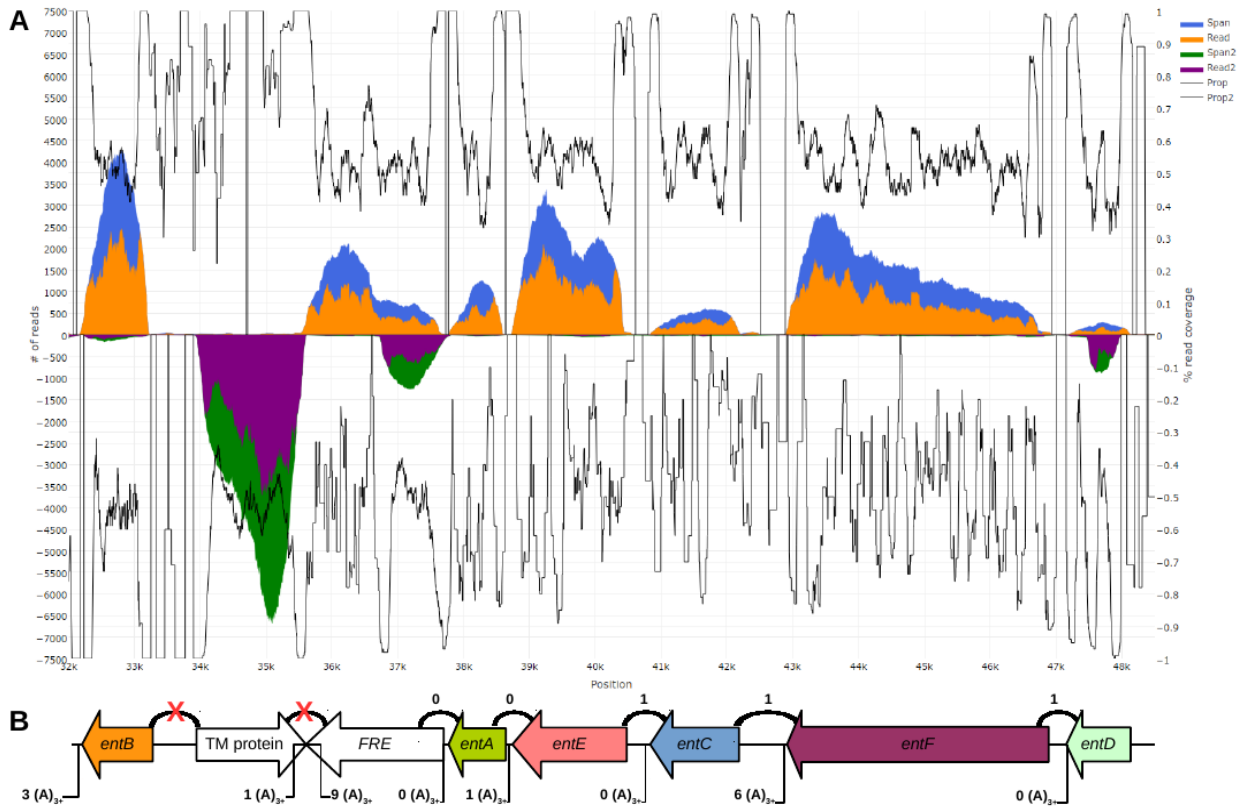

559

560 **Fig. S3. Transcriptomics of the siderophore biosynthesis genes in *St. bombicola*.**

561 (A) The orange area indicates per-base coverage by RNA-seq reads (read coverage). The blue  
 562 area indicates per-base cumulative coverage by RNA-seq reads and inserts between read pairs  
 563 (span coverage). The purple area indicates read coverage of the opposite strand. The green area  
 564 indicates span coverage of the opposite strand. The black lines indicate the ratios of the read  
 565 coverage over the span coverage data for the relevant strand. (B) Diagram of siderophore  
 566 biosynthesis genes in the *St. bombicola* genome, drawn to scale. Counts above indicate read pairs  
 567 cross-mapping between genes. Counts below indicate reads containing putative poly(A) tails.

568

569

570

571

572

573

574

575

576

577 **Fig. S4. Transcriptomics of the siderophore biosynthesis genes in *C. apicola*.**

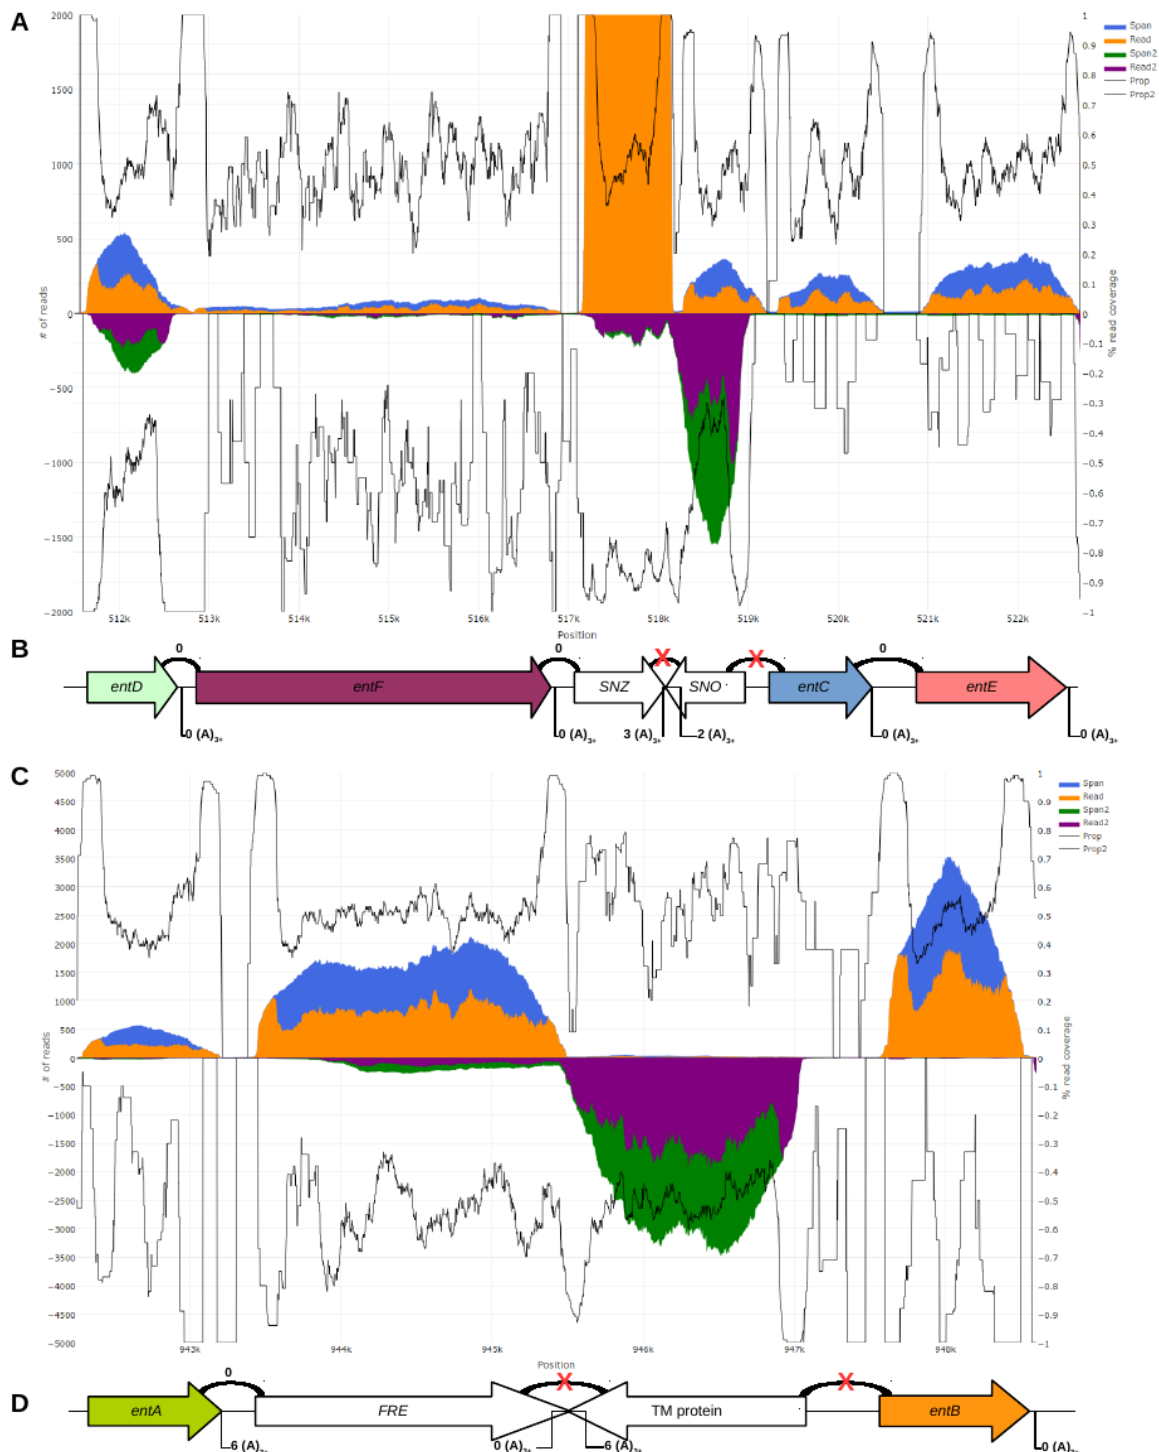

578 (A, C) The orange area indicates per-base coverage by RNA-seq reads (read coverage). The blue  
 579 area indicates per-base cumulative coverage by RNA-seq reads and inserts between read pairs  
 580 (span coverage). The purple area indicates read coverage of the opposite strand. The green area  
 581 indicates span coverage of the opposite strand. The black lines indicate the ratios of the read  
 582 coverage over the span coverage data for the relevant strand. (B, D) Diagrams of siderophore

583 biosynthesis genes in the *C. apicola* genome, drawn to scale. Counts above indicate read pairs  
584 cross-mapping between genes. Counts below indicate reads containing putative poly(A) tails.

585

586

587

588

589

590

591

592

593

594

595

596

597

598

599

600

601

602

603

604

605

606

607

608

609

610

611

612

613

614

615

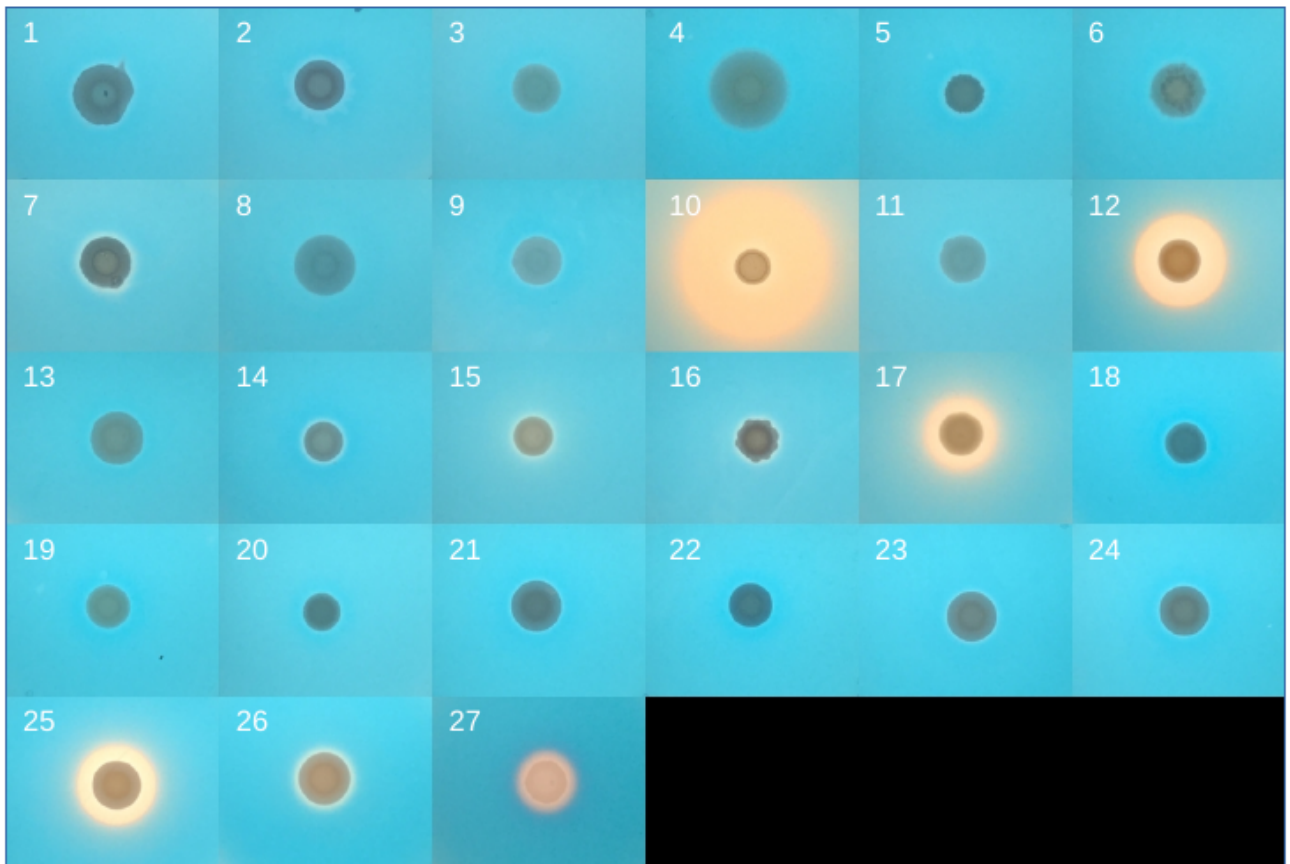

616 **Fig. S5. CAS assay for all species studied.**

617 Species legend: (1) *Saccharomyces cerevisiae* FM1282, (2) *Kluyveromyces lactis* CBS 2359, (3)  
618 *Tortispora caseinolytica* NRRL Y-17796<sup>T</sup>, (4) *Yarrowia keelungensis* NRRL Y-63742<sup>T</sup>, (5)  
619 *Yarrowia deformans* NRRL Y-321<sup>T</sup>, (6) *Yarrowia lipolytica* NRRL YB-423<sup>T</sup>, (7) *Blastobotrys*  
620 (*Arxula*) *adenivorans* NRRL Y-17592, (8) *Sugiyamaella lignohabitans* NRRL YB-1473<sup>T</sup>, (9)  
621 *Candida hasegawae* JCM 12559<sup>T</sup>, (10) *Candida pararugosa* NRRL Y-17089<sup>T</sup>, (11)  
622 *Wickerhamiella cacticola* NRRL Y-27362<sup>T</sup>, (12) *Candida versatilis* NRRL Y-6652<sup>T</sup>, (13)  
623 *Candida gropengiesseri* NRRL Y-17142<sup>T</sup>, (14) *Candida davenportii* CBS 9069<sup>T</sup>, (15) *Candida*  
624 *ratchasimensis* CBS 10611<sup>T</sup>, (16) *Candida apicola* NRRL Y-2481<sup>T</sup>, (17) *Candida riodesensis*  
625 NRRL Y-27859<sup>T</sup>, (18) *Candida infanticola* NRRL Y-17858<sup>T</sup>, (19) *Wickerhamiella occidentalis*  
626 NRRL Y-27364, (20) *Wickerhamiella domercqiae* NRRL Y-6692<sup>T</sup>, (21) *Candida tilneyi* CBS  
627 8794<sup>T</sup>, (22) *Candida sorbosivorans* CBS 8768<sup>T</sup>, (23) *Candida geochares* NRRL Y-17073<sup>T</sup>,  
628 (24) *Candida vaccinii* NRRL Y-17684<sup>T</sup>, (25) *Candida kuoi* NRRL Y-27208<sup>T</sup>, (26) *Starmerella*  
629 *bombicola* NRRL Y-17069<sup>T</sup>, and (27) *Escherichia coli* MG1655 (positive control).

630

631

632 **Table S1 (separate file)**

633 List of genomes and putative hits to iron utilization proteins analyzed in this study. Unless  
634 otherwise specified, query proteins were from *S. cerevisiae*.

635

636 **Table S2 (separate file)**

637 List and statistics of novel yeast genomes sequenced in this study.

638

639 **Table S3 (separate file)**

640 List of Gammaproteobacteria species with the six siderophore biosynthesis genes (*entA-entF*)  
641 analyzed in this study.

642

643 **Table S4 (separate file)**

644 Newick format strings of phylogenetic trees reconstructed from individual *ent* genes and from  
645 the concatenated superalignments.

646

647 **Table S5 (separate file)**

648 P-values from the AU test between phylogenies reconstructed under 12-species and 11-species  
649 monophyletic constraints.

650

651 **Table S6 (separate file)**

652 Normalized per-base coverage of the *ent* genes from *C. versatilis*, *C. apicola*, and *St. bombycola*.

653
